# Supplementary material for: Confirmatory testing of primary aldosteronism with saline infusion test and LC-MS/MS
Source: PubMed Central journal article supplement (PMC7709890; doi:10.1530/eje-20-0073), 2020-10-20
Supplement: supplementary_material_1.pdf [file supplementary_material_1.pdf]

## **Supplementary Material**

### **Confirmatory Testing of Primary Aldosteronism with Saline Infusion Test and LC-MS/MS**

Carmina Teresa Fuss<sup>1</sup>, Katharina Brohm<sup>1</sup>, Max Kurlbaum<sup>1,2</sup>, Anke Hannemann<sup>3</sup>, Sabine Kendl<sup>1</sup>, Martin Fassnacht<sup>1</sup>, Timo Deutschbein<sup>1</sup>, Stefanie Hahner<sup>1</sup>, Matthias Kroiss<sup>1,2</sup>

<sup>1</sup>Division of Endocrinology and Diabetes, Department of Internal Medicine I, University Hospital, University of Würzburg, Germany

<sup>2</sup>Central Laboratory, Core Unit Clinical Mass Spectrometry, University Hospital Würzburg , Germany

<sup>3</sup>Institute of Clinical Chemistry and Laboratory Medicine, University Medicine Greifswald, Germany

**Short Title:** LC-MS/MS-specific Cut-Off for Saline Infusion Test

**Key Words:** primary aldosteronism, mass spectrometry, salt loading test, Conn's syndrome, secondary arterial hypertension

#### **Corresponding Author:**

Matthias Kroiss, M.D., PhD

Department of Internal Medicine I

Endocrine and Diabetes Unit

University Hospital Würzburg

University of Würzburg

Oberdürrbacher Strasse 6

97080 Würzburg (Germany)

Phone: +49-(0)931-201-39740

Fax: +49-(0)931-201-6039740

E-Mail: Kroiss\_M@ukw.de

**Supplementary Figure 1**

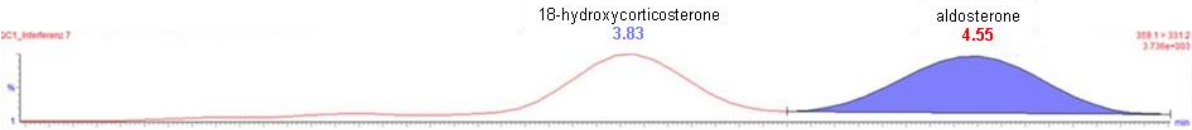

LC-MS/MS chromatogram demonstrating base-line separation between aldosterone and 18-hydroxycorticosterone. Retention time 18-hydroxycorticosterone = 3.83 min, retention time aldosterone = 4.55 min.

Supplementary Figure 2

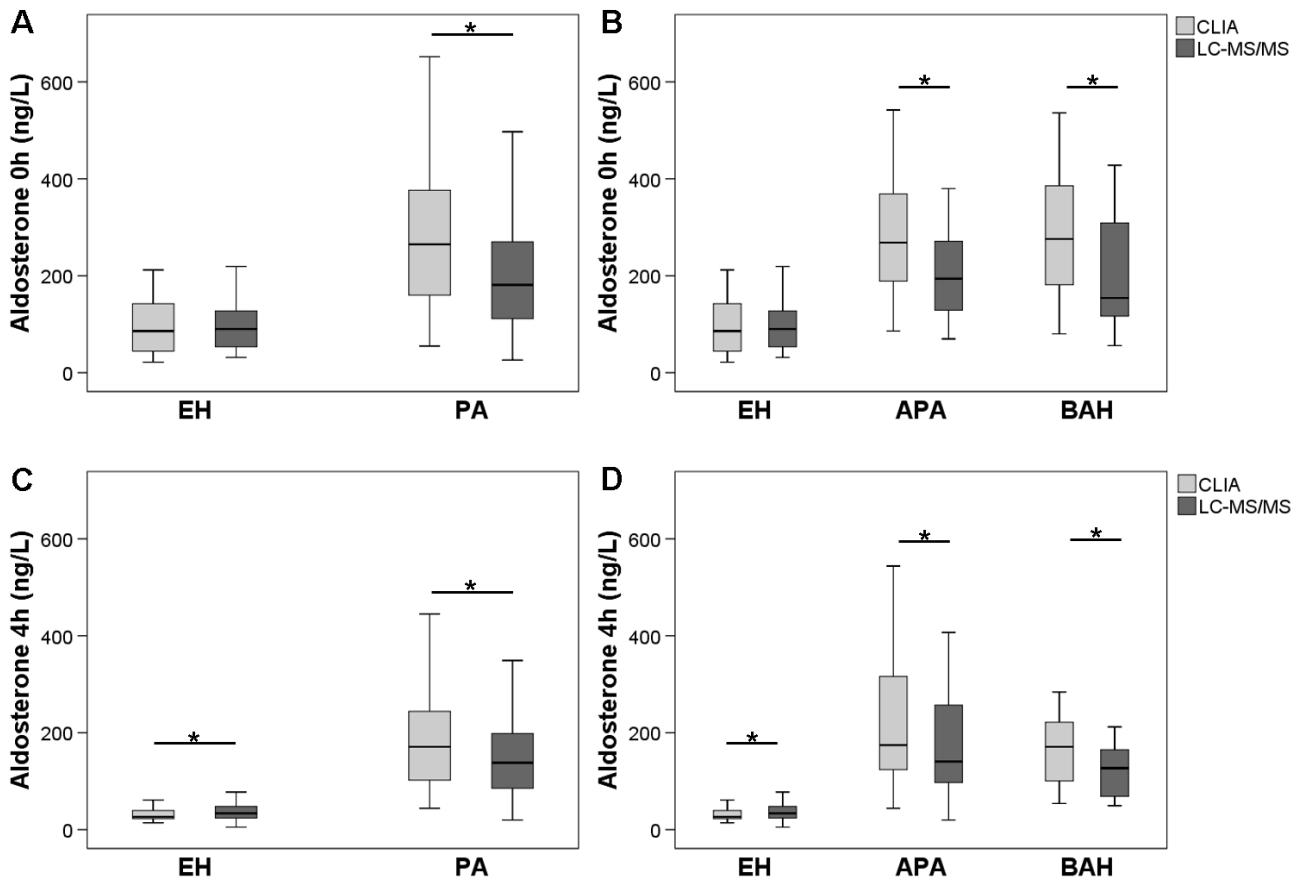

Aldosterone concentrations measured by **CLIA** (ISYS®) and LC-MS/MS during saline infusion testing in patients with essential hypertension (EH, **A-D**), primary aldosteronism (PA, **A+C**), aldosterone-producing adenoma (APA, **B+D**) and bilateral adrenal hyperplasia (BAH, **B+D**) before (0h, **A+B**) and after (4h, **C+D**) saline infusion. \* $p < 0.01$  (Wilcoxon test).

Supplementary Figure 3

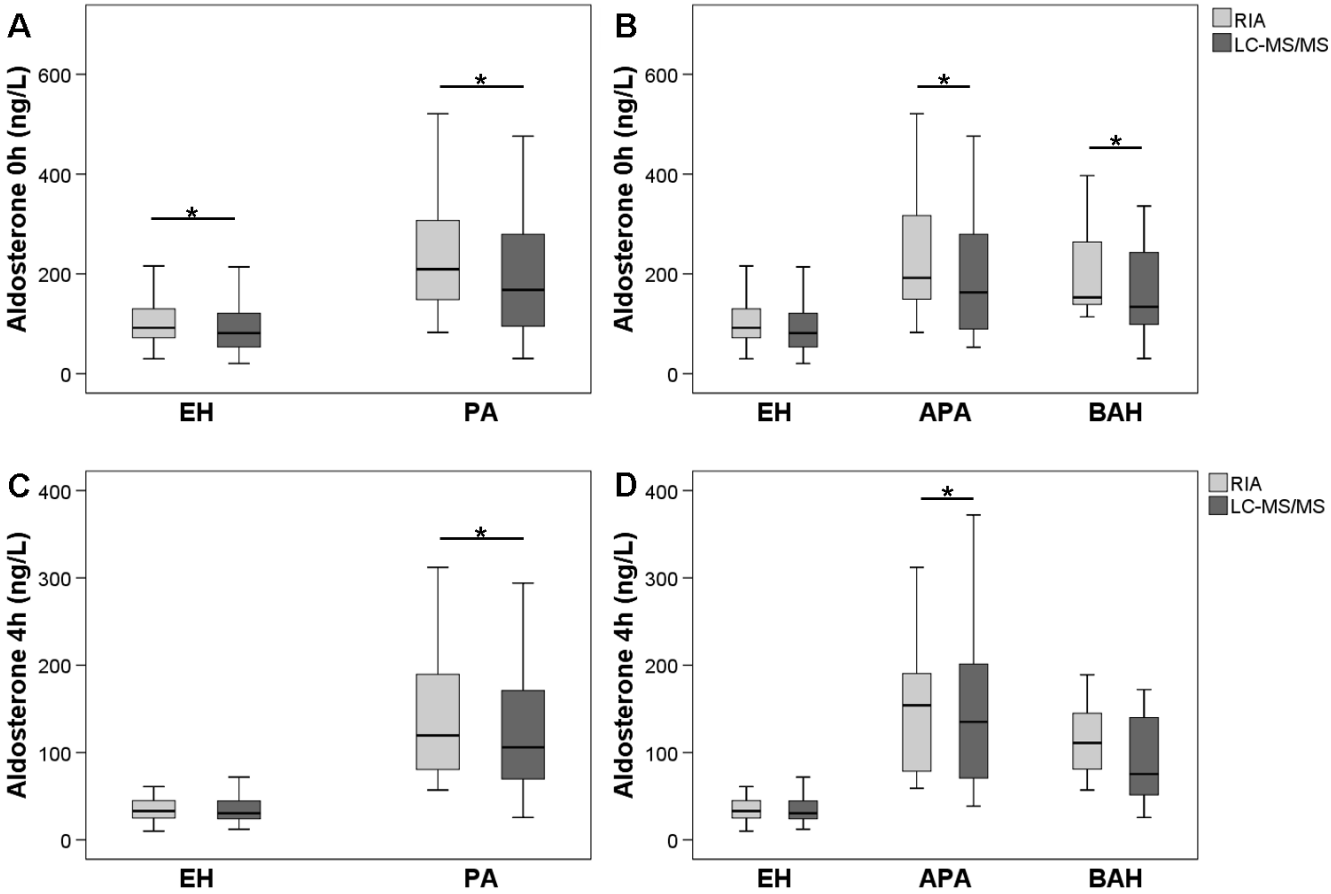

Aldosterone concentrations measured by **RIA** (Siemens®) and LC-MS/MS during saline infusion testing in patients with essential hypertension (EH, **A-D**), primary aldosteronism (PA, **A+C**), aldosterone-producing adenoma (APA, **B+D**) and bilateral adrenal hyperplasia (BAH, **B+D**) before (0h, **A+B**) and after (4h, **C+D**) saline infusion. \*p<0.01 (Wilcoxon test).
